# Supplementary material for: Sequence Capture From Historical Museum Specimens: Maximizing Value for Population and Phylogenomic Studies
Source: Frontiers journal article supplement (doi:10.3389/fevo.2022.931644), 2022-07-22
Supplement: Data_Sheet_1.XLSX [file Data_Sheet_1.XLSX]

## Sheet: Table S1
Supplementary Table S1: Specimen metadata and summary statistics for rodent samples
voucher_ID	collection year	collection	tissue_type	indexing	prop_>40%_captured_of_1413	on_target_dedup	av_hetero	av_coverage	raw_read_count	dedup_read_count	dedup_reads_on_target_count	extracted DNA conc (ng/uL)	usable_(Y/N)	source	doi
M21344	1985	Western Australia Museum	B	double	0.973107	0.801481	0.18314	84.21	2390076	1593397	1277078	15.4	Y	Roycroft et al. 2022 (in review)
NHMUK ZD 1950.1720	1947	Natural History Museum, London	TP	double	0.973107	0.664848	0.18204	53.88	2094873	1330567	884625	23.6	Y	Roycroft 2020 (PhD thesis)	hdl.handle.net/11343/241649
NHMUK ZD 1950.1163	1950	Natural History Museum, London	TP	double	0.965322	0.815496	0.0956598	103.65	3909810	1859255	1516215	42	Y	Roycroft et al. 2022 (in review)
C7585	1862	Museums Victoria	B	double	0.995754	0.850064	0.144375	174.67	3310901	2016348	1714025	234	Y	Roycroft et al. 2021 (PNAS)	10.1073/pnas.2021390118
C1001	1857	Museums Victoria	TP	double	0.983723	0.793149	0.183825	341.3	6743988	3470542	2752658	27.6	Y	Roycroft et al. 2022 (in review)
C985	1857	Museums Victoria	TP	double	0.98443	0.832941	0.181581	219.18	4474419	2451002	2041539	10.6	Y	Roycroft et al. 2022 (in review)
NHMUK ZD 1912.1.31.1	1912	Natural History Museum, London	TP	double	0.970984	0.833667	0.0664714	146.02	2843244	1853575	1545264	16.2	Y	Roycroft et al. 2022 (in review)
NHMUK ZD 1953.401	1951	Natural History Museum, London	TP	double	0.975938	0.81532	0.120466	339.79	6928345	3718574	3031829	6.12	Y	Roycroft et al. 2022 (in review)
C512	1916	Museums Victoria	TP	double	0.987969	0.695175	0.183126	138.79	7120351	2600341	1807692	5.9	Y	Roycroft et al. 2021 (PNAS)	10.1073/pnas.2021390118
M.1300	1898	Australian Museum	B	double	0.922151	0.554213	0.288299	10.93	1429957	379432	210286	3.24	Y	Roycroft et al. 2021 (PNAS)	10.1073/pnas.2021390118
M.1300	1898	Australian Museum	TP	double	0.982307	0.571098	0.475011	22.63	2534948	678476	387476	5.34	Y	Roycroft et al. 2021 (PNAS)	10.1073/pnas.2021390118
NHMUK ZD 1969.364	1968	Natural History Museum, London	TP	double	0.982307	0.711565	0.105349	89.15	4581634	1711486	1217834	2.7	Y	Roycroft et al. 2022 (in review)
NHMUK ZD 1929.5.27.49	1929	Natural History Museum, London	TP	double	0.995754	0.5354	0.271044	87.09	7837878	2046394	1095639	18	Y	Roycroft et al. 2022 (in review)
NHMUK ZD 1976.1020	1975	Natural History Museum, London	TP	double	0.96603	0.825687	0.104079	97.51	3557260	1835127	1515240	5.02	Y	Roycroft et al. 2022 (in review)
CM16506	1969	Australian National Wildlife Coll.	B	double	0.914367	0.770349	0.0350388	6.14	281589	201375	155129	11.7	Y	Roycroft et al. 2022 (in review)
M23084	1985	Western Australia Museum	B	double	0.970276	0.762269	0.160198	153.29	3619386	1998554	1523436	6.24	Y	Roycroft et al. 2022 (in review)
C146	1857	Museums Victoria	TP	double	0.796886	0.510184	0.114912	6.83	721779	306013	156123	5.52	N
C148	1857	Museums Victoria	TP	double	0.992923	0.826364	0.150409	150.04	2757066	1676222	1385169	6.86	Y	Roycroft 2020 (PhD thesis)	hdl.handle.net/11343/241649
C149	1857	Museums Victoria	TP	double	0.992923	0.828175	0.153649	158.65	3191026	1930916	1599136	19	Y	Roycroft 2020 (PhD thesis)	hdl.handle.net/11343/241649
C15037	1962	Museums Victoria	TP	double	0.992923	0.831601	0.0819195	262.92	3652925	2078088	1728141	16.3	Y	Roycroft 2020 (PhD thesis)	hdl.handle.net/11343/241649
C15042	1974	Museums Victoria	TP	double	0.992923	0.80956	0.0684686	413.67	5609528	2877950	2329873	13.9	Y	Roycroft 2020 (PhD thesis)	hdl.handle.net/11343/241649
C853	1937	Museums Victoria	TP	double	1	0.738188	0.103077	213.62	3597462	2262653	1670264	19.7	Y	Roycroft 2020 (PhD thesis)	hdl.handle.net/11343/241649
C22127	1970	Museums Victoria	TP	double	0.973107	0.808773	0.113451	215.59	4477518	2432667	1967475	20.2	Y	Roycroft 2020 (PhD thesis)	hdl.handle.net/11343/241649
C22541	1975	Museums Victoria	TP	double	0.944091	0.544793	0.223218	9.53	835801	295518	160996	6.1	N
NHMUK ZD 1922.5.16.50	1921	Natural History Museum, London	TP	double	0.993631	0.643471	0.362929	35.76	4217970	1015872	653684	44	Y	Roycroft 2020 (PhD thesis)	hdl.handle.net/11343/241649
NHMUK ZD 1953.263	1953	Natural History Museum, London	TP	double	0.973815	0.79668	0.0786027	177.89	5244228	3003229	2392613	22.2	Y	Roycroft 2020 (PhD thesis)	hdl.handle.net/11343/241649
NHMUK ZD 1928.10.1.35	1914	Natural History Museum, London	TP	double	0.973815	0.810445	0.220092	163.85	5240516	2560841	2075422	5.2	Y	Roycroft 2020 (PhD thesis)	hdl.handle.net/11343/241649
NHMUK ZD 1969.355	1969	Natural History Museum, London	TP	double	0.974522	0.669183	0.19609	127.12	8620129	2941908	1968674	5.74	Y	Roycroft 2020 (PhD thesis)	hdl.handle.net/11343/241649
NHMUK ZD 1923.9.1.56	1923	Natural History Museum, London	TP	double	0.994338	0.741358	0.142957	303.22	5788808	3485446	2583963	3.86	Y	Roycroft et al. 2022 (in review)
NHMUK ZD 1969.354	1969	Natural History Museum, London	TP	double	0.974522	0.825943	0.102138	233.7	5164021	2759755	2279400	29.8	Y	Roycroft 2020 (PhD thesis)	hdl.handle.net/11343/241649
M.7200	1945	Australian Museum	B	double	0.992923	0.611728	0.100113	56.34	3915799	1400751	856879	not recorded	Y	Roycroft et al. 2022 (in review)
M.7200	1945	Australian Museum	TP	double	0.993631	0.693276	0.0617572	77.76	4043069	1706287	1182927	not recorded	Y	Roycroft et al. 2022 (in review)
NHMUK ZD 1923.4.3.12	1922	Natural History Museum, London	TP	double	0.975938	0.810737	0.076916	197.72	3111266	1810793	1468077	5.1	Y	Roycroft et al. 2022 (in review)
M25412	1985	Western Australia Museum	S	double	0.993631	0.562058	0.151186	18.54	1552898	617225	346916	1.35	Y	Roycroft et al. 2022 (in review)
AMNH 150923	1938	American Museum of Natural Hist.	S	double	0.604388	0.709492	0.0213056	3.51	159376	113990	80875	2.62	Y	Roycroft et al. 2022 (in review)
NHMUK ZD 1978.2959	1978	Natural History Museum, London	S	double	0.772116	0.726504	0.0434792	4.63	226056	162807	118280	61.8	Y	Roycroft et al. 2022 (in review)
NHMUK ZD 1990.208	1928	Natural History Museum, London	S	double	0.995754	0.697484	0.30326	47.74	4035895	1723887	1202384	37.2	Y	Roycroft et al. 2022 (in review)
C7585	1862	Museums Victoria	S	double	0.979476	0.607754	0.411948	17.38	2021802	494718	300667	10.5	Y	Roycroft 2020 (PhD thesis)	hdl.handle.net/11343/241649
NHMUK ZD 1967.181	1946	Natural History Museum, London	S	double	0.126681	0.545376	0.0625053	3.24	583735	185320	101069	5.94	Y	Roycroft 2020 (PhD thesis)	hdl.handle.net/11343/241649
NHMUK ZD 1967.113	1946	Natural History Museum, London	S	double	0.400566	0.612878	0.103289	6.82	843238	224782	137764	13.6	Y	Roycroft 2020 (PhD thesis)	hdl.handle.net/11343/241649
NHMUK ZD 1947.1303	1940	Natural History Museum, London	S	double	0.985138	0.501433	0.142738	11.96	1273594	485754	243573	14.1	Y	Roycroft et al. 2022 (in review)
C1001	1857	Museums Victoria	S	double	0.0106157	0.298847	0.0100212	2.06	172485	88112	26332	25.8	N
M33494	1987	Western Australia Museum	S	double	0.0353857	0.297739	0.00155258	1.64	112883	102301	30459	2.7	N
NHMUK ZD 1897.8.7.70	1897	Natural History Museum, London	S	double	0.707006	0.492074	0.321355	6.58	1205324	344133	169339	1.39	Y	Roycroft 2020 (PhD thesis)	hdl.handle.net/11343/241649
NHMUK ZD 1920.7.26.27	1920	Natural History Museum, London	S	double	0.973815	0.746036	0.140854	156.97	7187090	2784308	2077194	7.9	Y	Roycroft et al. 2022 (in review)
NHMUK ZD 1920.7.26.19	1920	Natural History Museum, London	S	double	0.981599	0.747488	0.188433	200.41	6193824	2142755	1601683	1.13	Y	Roycroft et al. 2022 (in review)
M.1300	1898	Australian Museum	S	double	0.103326	0.569528	0.0318701	2.95	188402	86419	49218	2.04	N
NHMUK ZD 1841.1167	1841	Natural History Museum, London	S	double	0.980892	0.552869	0.403663	18.14	2594134	831157	459521	28.4	Y	Roycroft et al. 2021 (PNAS)	10.1073/pnas.2021390118
NHMUK ZD 1844.7.9.14	1843	Natural History Museum, London	S	double	0.31564	0.383714	0.0639591	4.94	480839	205739	78945	2.92	N
M.17883	1986	Australian Museum	S	double	0.981599	0.803534	0.12549	350.49	5756003	2654946	2133339	10.8	Y	Roycroft et al. 2022 (in review)
NHMUK ZD 1947.1263	1940	Natural History Museum, London	S	double	0.457891	0.427945	0.103275	3.92	535081	284894	121919	1.14	Y	Roycroft et al. 2022 (in review)
M25386	1984	Western Australia Museum	S	double	0	0.373132	0	0.69	37741	33519	12507	19.5	N
M25319	1985	Western Australia Museum	S	double	0	0.685693	0	0.69	22779	18571	12734	59	N
M.14168	1979	Australian Museum	S	double	0.933475	0.412045	0.159294	12.41	892518	580436	239166	31.4	Y	Roycroft et al. 2022 (in review)
NHMUK ZD 1843.8.12.52	1843	Natural History Museum, London	S	double	0.69356	0.529075	0.0978405	14.11	1018198	249823	132175	1.31	Y	Roycroft et al. 2021 (PNAS)	10.1073/pnas.2021390118
NHMUK ZD 1846.4.4.67	1846	Natural History Museum, London	S	double	0.204529	0.33113	0.0371983	4.02	441679	215731	71435	2.18	N	Roycroft 2020 (PhD thesis)	hdl.handle.net/11343/241649
M.1069	1896	Australian Museum	S	double	0.00212314	0.283302	0.00119972	0.8	80417	57751	16361	5.5	N	Roycroft 2020 (PhD thesis)	hdl.handle.net/11343/241649
NHMUK ZD 1922..2.2.19	1920	Natural History Museum, London	S	double	0.668082	0.438012	0.0167819	2.19	240791	178616	78236	6.1	N
NHMUK ZD 1910.3.2.18	1910	Natural History Museum, London	S	double	0.915782	0.784177	0.0552294	5.72	225641	167049	130996	14.5	Y	Roycroft 2020 (PhD thesis)	hdl.handle.net/11343/241649
NHMUK ZD 1934.6.1.1	1934	Natural History Museum, London	S	double	0.947629	0.52774	0.179901	19.68	2215013	570281	300960	16.5	Y	Roycroft 2020 (PhD thesis)	hdl.handle.net/11343/241649
NHMUK ZD 1899.8.6.31	1897	Natural History Museum, London	S	double	0.993631	0.674189	0.303084	23.74	3499577	1101370	742531	15.7	Y	Roycroft 2020 (PhD thesis)	hdl.handle.net/11343/241649
NHMUK ZD 1881.3.28.1	1881	Natural History Museum, London	S	double	0.969568	0.702663	0.213797	66.27	5825034	1952325	1371826	11.6	Y	Roycroft 2020 (PhD thesis)	hdl.handle.net/11343/241649
M.30618	1994	Australian Museum	S	double	0.974522	0.654711	0.134227	148.36	4426134	1837327	1202919	70.3	Y	Roycroft et al. 2022 (in review)
NHMUK ZD 1913.6.18.64	1912	Natural History Museum, London	S	double	0.0403397	0.583786	0.0203952	3.39	507388	153438	89575	29.2	N
NHMUK ZD 1947.1148	1940	Natural History Museum, London	S	double	0.965322	0.651709	0.129725	9.57	1117015	478881	312091	7.88	Y	Roycroft 2020 (PhD thesis)	hdl.handle.net/11343/241649
NHMUK ZD 1950.1208	1936	Natural History Museum, London	S	double	0.787686	0.589557	0.0259421	2.7	257358	172365	101619	43.2	Y	Roycroft 2020 (PhD thesis)	hdl.handle.net/11343/241649
A.11257	1881	Australian Museum	S	double	0.295824	0.254909	0.070374	4.03	360363	185207	47211	1.45	N
NHMUK ZD 1922.2.2.24	1920	Natural History Museum, London	S	double	0.501769	0.460111	0.125963	2.59	383653	169133	77820	3.9	Y	Roycroft 2020 (PhD thesis)	hdl.handle.net/11343/241649
M47482	1997	Western Australia Museum	S	double	0.0849257	0.722742	0.00352858	2.09	89443	67064	48470	21.4	N
NHMUK ZD 1872.3.5.3	1870	Natural History Museum, London	S	double	0.975938	0.601189	0.146733	43.01	3971694	1112877	669049	5.72	Y	Roycroft et al. 2022 (in review)
M.7200	1945	Australian Museum	S	double	0.115357	0.39363	0.04247	4.19	452726	162866	64109	1.68	N
NHMUK ZD 1889.4.3.7	1889	Natural History Museum, London	S	double	0.00920028	0.160636	0	1.22	243103	136389	21909	6.32	N
NHMUK ZD 1913.6.18.13	1912	Natural History Museum, London	S	double	0.884643	0.479117	0.0954058	11.36	1339180	395949	189706	4.6	Y	Roycroft et al. 2022 (in review)
NHMUK ZD 1889.4.3.8	1886	Natural History Museum, London	S	double	0.974522	0.661039	0.17868	50.41	3624299	1092538	722210	2.8	Y	Roycroft et al. 2022 (in review)
NHMUK ZD 1889.4.3.9	1889	Natural History Museum, London	S	double	0.957537	0.490913	0.210106	20.15	2473675	648604	318408	5.12	Y	Roycroft et al. 2022 (in review)
M.19739	1933	Australian Museum	S	double	0.969568	0.613586	0.235074	37.68	3350772	879944	539921	3.96	Y	Roycroft et al. 2022 (in review)
NHMUK ZD 1913.6.18.8	1913	Natural History Museum, London	S	double	0.975938	0.610347	0.157572	46.1	4196988	1175284	717331	17.3	Y	Roycroft et al. 2022 (in review)
NHMUK ZD 1913.6.18.16	1913	Natural History Museum, London	S	double	0.982307	0.791651	0.30921	145.09	3875679	1904500	1507699	6.12	Y	Roycroft et al. 2022 (in review)
NHMUK ZD 1904.4.4.13	1903	Natural History Museum, London	S	double	0.997877	0.513955	0.309746	15.09	2664385	935849	480984	4.02	Y	Roycroft et al. 2022 (in review)
C7586	1862	Museums Victoria	B	single	0.994354	0.225517	0.20771	176.19	12670985	4370871	985704	not recorded	Y	Roycroft et al. 2021 (PNAS)	10.1073/pnas.2021390118
C7586	1862	Museums Victoria	S	single	0.988709	0.211633	0.504848	27.77	5824293	2252624	476730	not recorded	N
C90	1857	Museums Victoria	B	single	0.993649	0.171141	0.698619	22.33	5194627	2829854	484303	not recorded	N
C90	1857	Museums Victoria	TP	single	0.974594	0.116999	0.335603	11.22	3400658	2222031	259975	not recorded	N
C132	1950	Museums Victoria	B	single	0.903317	0.251842	0.567784	37.72	4334011	1814428	456949	not recorded	Y	Roycroft 2020 (PhD thesis)	hdl.handle.net/11343/241649
C132	1950	Museums Victoria	TP	single	0.988709	0.273642	0.427304	232.84	21601131	7935239	2171414	not recorded	Y	Roycroft 2020 (PhD thesis)	hdl.handle.net/11343/241649
C35845	1973	Museums Victoria	TP	single	0.995766	0.279502	0.369167	387.48	22900227	8829086	2467745	not recorded	Y	Roycroft 2020 (PhD thesis)	hdl.handle.net/11343/241649
C6278	1901	Museums Victoria	TP	single	0.993649	0.673013	0.220155	203.4	7642663	3348161	2253356	6.98	Y	Roycroft 2020 (PhD thesis)	hdl.handle.net/11343/241649
C90	1857	Museums Victoria	S	single	0.978123	0.119402	0.226758	30.55	15042139	3980444	475271	7.24	N
C90	1857	Museums Victoria	TP	single	0.99506	0.661545	0.106878	103.43	14192698	6818253	4510584	13.9	Y	Roycroft 2020 (PhD thesis)	hdl.handle.net/11343/241649
C94	1857	Museums Victoria	S	single	0.263938	0.157392	0.0410007	3.67	767882	369308	58126	12.8	N
C94	1857	Museums Victoria	TP	single	0.992237	0.508824	0.466998	65.34	6603438	2403490	1222953	7.88	Y	Roycroft et al. 2021 (PNAS)	10.1073/pnas.2021390118
C955	1857	Museums Victoria	TP	single	0.998589	0.538613	0.172875	133.36	8840720	3169976	1707389	9.16	Y	Roycroft 2020 (PhD thesis)	hdl.handle.net/11343/241649

## Sheet: Table S2
Supplementary Table S2: Specimen metadata for Petrogale rock-wallaby samples included in the population genomic analyses
Index number	Sample ID	Genus	Species	Sub-species	Lineage	Institution	Family	SRA Accession	Locality	Latitude	Longitude	State	Country	Sample Year	Failed	SRA Biosample Accession	SRA Bioproject Accession	extracted DNA conc (ng/uL)
SP14_indexing1	M08767	Petrogale	concinna	canescens		Australian National Wildlife Collection	Macropodidae	TBA	Mt Borradaile, NW of Oenpelli	-12.05	132.9	Northern Territory	Australia	1973		SAMN28906521	PRJNA846960	13.3
SP14_indexing2	M08766	Petrogale	concinna	canescens		Australian National Wildlife Collection	Macropodidae	TBA	Mt Borradaile, NW of Oenpelli	-12.05	132.9	Northern Territory	Australia	1973		SAMN28906522	PRJNA846960	12.6
SP14_indexing3	C6052	Petrogale	concinna	canescens		Museum Victoria	Macropodidae	TBA	East Alligator River	-12.345	132.989	Northern Territory	Australia	1912	X			5.8
SP14_indexing4	C6475	Petrogale	concinna	canescens		Museum Victoria	Macropodidae	TBA	Oenpelli	-12.0348	133.023	Northern Territory	Australia	1912		SAMN28906523	PRJNA846960	26.1
SP14_indexing5	WAM9346	Petrogale	concinna	monastria		Western Australian Museum	Macropodidae	TBA	Borda Island	-14.2472	126.0097	Western Australia	Australia	1972	X			8.5
SP14_indexing6	WAM12401	Petrogale	concinna	monastria		Western Australian Museum	Macropodidae	TBA	Prince Regent River	-15.5725	125.6022	Western Australia	Australia	1974	X			54.1
SP14_indexing7	WAM12400	Petrogale	concinna	monastria		Western Australian Museum	Macropodidae	TBA	Prince Regent River	-15.5725	125.6022	Western Australia	Australia	1974	X			79.7
SP14_indexing8	WAM24428	Petrogale	concinna	monastria		Western Australian Museum	Macropodidae	TBA	Kalumburu	-14.3000	126.0000	Western Australia	Australia	1965		SAMN28906524	PRJNA846960	11
SP14_indexing9	WAM3026	Petrogale	concinna	monastria		Western Australian Museum	Macropodidae	TBA	Wotjulum Mission	-16.1833	123.6167	Western Australia	Australia	1954		SAMN28906525	PRJNA846960	15.4
SP14_indexing10	WAM4169	Petrogale	concinna	monastria		Western Australian Museum	Macropodidae	TBA	Kalumburu Mission, Cave, on Pago Road	-14.2041	126.6500	Western Australia	Australia	1960		SAMN28906526	PRJNA846960	23
SP14_indexing11	WAM3185	Petrogale	concinna	monastria		Western Australian Museum	Macropodidae	TBA	Wotjulum Mission, Townsite	-16.1833	123.6167	Western Australia	Australia	1956	X			136.4
SP14_indexing12	WAM9288	Petrogale	concinna	monastria		Western Australian Museum	Macropodidae	TBA	Augustus Island	-15.4083	124.5417	Western Australia	Australia	1972		SAMN28906527	PRJNA846960	10.4
SP14_indexing13	WAM558	Petrogale	concinna	monastria		Western Australian Museum	Macropodidae	TBA	Drysdale River	-14.1277	126.7194	Western Australia	Australia	1922	X			7.7
SP14_indexing14	WAM2007	Petrogale	concinna	monastria		Western Australian Museum	Macropodidae	TBA	Kunmunya Hill	-15.4333	124.7000	Western Australia	Australia	1936	X			7.9
SP14_indexing15	WAM9360	Petrogale	concinna	monastria		Western Australian Museum	Macropodidae	TBA	Borda Island	-14.2472	126.0097	Western Australia	Australia	1972		SAMN28906528	PRJNA846960	7.7
SP14_indexing16	WAM9358	Petrogale	burbidgei			Western Australian Museum	Macropodidae	TBA	Warrender Hill	-14.4666	125.5222	Western Australia	Australia	1972	X			3.8
SP14_indexing17	WAM9362	Petrogale	burbidgei			Western Australian Museum	Macropodidae	TBA	Warrender Hill	-14.4666	125.5222	Western Australia	Australia	1972	X			6.8
SP14_indexing18	DTC187	Petrogale	wilkinsi		GROOTE	Museum Victoria	Macropodidae	TBA	Groote Eylandt	-13.82	136.63	Northern Territory	Australia	1935		SAMN28906529	PRJNA846960	20.6
SP14_indexing19	DTC185	Petrogale	wilkinsi		GROOTE	Museum Victoria	Macropodidae	TBA	Groote Eylandt	-13.82	136.63	Northern Territory	Australia	1935		SAMN28906530	PRJNA846960	11
SP14_indexing20	DTC201	Petrogale	wilkinsi		GROOTE	Museum Victoria	Macropodidae	TBA	Groote Eylandt	-13.82	136.63	Northern Territory	Australia	1942		SAMN28906531	PRJNA846960	8.6
SP14_indexing21	DTC195	Petrogale	wilkinsi			Museum Victoria	Macropodidae	TBA	Mainland Point, Blue Mud Bay, NW of Round Hill Island	-13.32	136.05	Northern Territory	Australia	1942		SAMN28906532	PRJNA846960	12.5
SP14_indexing22	DTC207	Petrogale	wilkinsi			Museum Victoria	Macropodidae	TBA	Marchinbar Island,Wessel Islands	-11.28	136.12	Northern Territory	Australia	1942	X			4
SP14_indexing23	DTC208	Petrogale	wilkinsi			Museum Victoria	Macropodidae	TBA	Marchinbar Island,Wessel Islands	-11.28	136.12	Northern Territory	Australia	1942	X			24.2
SP14_indexing24	DTC206	Petrogale	wilkinsi			Museum Victoria	Macropodidae	TBA	Raragala Island,Wessell Islands	-11.62	136.28	Northern Territory	Australia	1942		SAMN28906533	PRJNA846960	11.5
SP14_indexing25	M08932	Petrogale	wilkinsi			Australian National Wildlife Collection	Macropodidae	TBA	Gunlom Falls, Arnhem Land Escarpment	-13.4333	132.417	Northern Territory	Australia	1972		SAMN28906534	PRJNA846960	11
SP14_indexing26	DTC204	Petrogale	wilkinsi		GULF	Museum Victoria	Macropodidae	TBA	Vanderlin Island	-15.7	136.98	Northern Territory	Australia	1942		SAMN28906535	PRJNA846960	15.3
SP14_indexing27	DTC205	Petrogale	wilkinsi		GULF	Museum Victoria	Macropodidae	TBA	Vanderlin Island	-15.7	136.98	Northern Territory	Australia	1942		SAMN28906536	PRJNA846960	29.3
SP14_indexing28	M15318	Petrogale	wilkinsi			Australian National Wildlife Collection	Macropodidae	TBA	Walmudga Hill, Roper River Mission	-14.7167	134.783	Northern Territory	Australia	1977		SAMN28906537	PRJNA846960	8.8
SP14_indexing29	M2672	Petrogale	wilkinsi		GULF	Australian National Wildlife Collection	Macropodidae	TBA	Webe Point, North Island, Sir Edward Pellew Group	-15.5667	136.833	Northern Territory	Australia	1967		SAMN28906538	PRJNA846960	5.2
SP14_indexing30	M2693	Petrogale	wilkinsi		GULF	Australian National Wildlife Collection	Macropodidae	TBA	Webe Point, North Island, Sir Edward Pellew Group	-15.5667	136.833	Northern Territory	Australia	1967		SAMN28906539	PRJNA846960	7.4
SP14_indexing31	M11738	Petrogale	wilkinsi			Australian National Wildlife Collection	Macropodidae	TBA	7km N of Barramundie Station site, Kapalga	-13.0667	132.45	Northern Territory	Australia	1975		SAMN28906540	PRJNA846960	10.1
SP14_indexing32	M07933	Petrogale	wilkinsi			Australian National Wildlife Collection	Macropodidae	TBA	2km S of Cannon Hill, East Alligator River	-12.3833	132.95	Northern Territory	Australia	1973		SAMN28906541	PRJNA846960	2.7
SP14_indexing33	M11995	Petrogale	brachyotis	victoriae		Australian National Wildlife Collection	Macropodidae	TBA	Dee Creek, Dorisvale Station	-14.6833	130.917	Northern Territory	Australia	1976		SAMN28906542	PRJNA846960	6.8
SP14_indexing34	M11996	Petrogale	brachyotis	victoriae		Australian National Wildlife Collection	Macropodidae	TBA	Dee Creek, Dorisvale Station	-14.6833	130.917	Northern Territory	Australia	1976		SAMN28906543	PRJNA846960	11.6
SP14_indexing35	M15306	Petrogale	brachyotis	victoriae		Australian National Wildlife Collection	Macropodidae	TBA	Lobby Creek, Bradshaw Station	-15.2	130.2	Northern Territory	Australia	1977		SAMN28906544	PRJNA846960	7.5
SP14_indexing36	WAM3129	Petrogale	brachyotis	brachyotis		Western Australian Museum	Macropodidae	TBA	Koolan	-16.1833	123.6167	Western Australia	Australia	1955		SAMN28906545	PRJNA846960	5.5
SP14_indexing37	WAM3025	Petrogale	brachyotis	brachyotis		Western Australian Museum	Macropodidae	TBA	Koolan	-16.1833	123.6167	Western Australia	Australia	1954	X			8.4
SP14_indexing38	WAM15357	Petrogale	brachyotis	brachyotis		Western Australian Museum	Macropodidae	TBA	Napier Downs Homestead	-17.2500	124.7250	Western Australia	Australia	1977		SAMN28906546	PRJNA846960	12.1
SP14_indexing39	WAM4095	Petrogale	brachyotis	brachyotis		Western Australian Museum	Macropodidae	TBA	Mount House	-17.0527	125.7028	Western Australia	Australia	1961		SAMN28906547	PRJNA846960	7
SP14_indexing40	M15511	Petrogale	brachyotis	brachyotis		Australian National Wildlife Collection	Macropodidae	TBA	Napier Downs Station, Napier Downs	-17.25	124.733	Western Australia	Australia	1970		SAMN28906548	PRJNA846960	4.1
SP14_indexing41	WAM14321	Petrogale	brachyotis	brachyotis		Western Australian Museum	Macropodidae	TBA	Drysdale River National Park	-14.6666	127.0000	Western Australia	Australia	1975	X			4.6
SP14_indexing42	WAM14323	Petrogale	brachyotis	brachyotis		Western Australian Museum	Macropodidae	TBA	Drysdale River National Park	-15.0333	126.6667	Western Australia	Australia	1975		SAMN28906549	PRJNA846960	7.6
SP14_indexing43	M15315	Petrogale	brachyotis	brachyotis		Australian National Wildlife Collection	Macropodidae	TBA	El Questro Station, Pentecost River	-16.05	127.983	Western Australia	Australia	1977		SAMN28906550	PRJNA846960	8.9
SP14_indexing44	WAM2006	Petrogale	brachyotis	brachyotis		Western Australian Museum	Macropodidae	TBA	Kunmunya Hill	-15.4333	124.7000	Western Australia	Australia	1936	X			10.6
SP14_indexing45	WAM24511	Petrogale	brachyotis	brachyotis		Western Australian Museum	Macropodidae	TBA	Mount Bell	-17.1666	125.3167	Western Australia	Australia	1968		SAMN28906551	PRJNA846960	2.3
SP14_indexing46	WAM17140	Petrogale	wilkinsi			Western Australian Museum	Macropodidae	TBA	Nellie Creek	-13.4833	132.0667	Northern Territory	Australia	1903	X			8.3
SP14_indexing47	WAM24401	Petrogale	brachyotis	brachyotis		Western Australian Museum	Macropodidae	TBA	Ninbing Bore	-15.2416	128.6750	Western Australia	Australia	1965	X			2.1
SP14_indexing48	WAM24402	Petrogale	brachyotis	brachyotis		Western Australian Museum	Macropodidae	TBA	Wyndham	-15.6375	128.2983	Western Australia	Australia	1965	X			6.9
SP14_indexing49	WAM15832	Petrogale	burbidgei			Western Australian Museum	Macropodidae	TBA	Mitchell Plateau	-14.5000	125.7889	Western Australia	Australia	1976		SAMN28906552	PRJNA846960	8.5
SP14_indexing50	WAM4173	Petrogale	concinna	monastria		Western Australian Museum	Macropodidae	TBA	Kalumburu Mission	-14.1666	126.5417	Western Australia	Australia	1960		SAMN28906553	PRJNA846960	9.6
SP14_indexing51	WAM17139	Petrogale	wilkinsi		GULF	Western Australian Museum	Macropodidae	TBA	Red Bank Mine, Wollogorang	-17.19	137.74	Northern Territory	Australia	1959	X			5.7
SP14_indexing52	WAM17416	Petrogale	brachyotis	brachyotis		Western Australian Museum	Macropodidae	TBA	Napier Broome Bay	-14.2	126.6	Western Australia	Australia	<1910	X			8.1
SP14_indexing53	WAM24405	Petrogale	brachyotis	brachyotis		Western Australian Museum	Macropodidae	TBA	Inglis Gap	-16.854	125.15	Western Australia	Australia	1965	X			10.3
SP14_indexing54	WAM24404	Petrogale	brachyotis	brachyotis		Western Australian Museum	Macropodidae	TBA	Inglis Gap	-16.854	125.15	Western Australia	Australia	1965	X			7.4
SP14_indexing55	M13577	Petrogale	wilkinsi		GULF	Australian National Wildlife Collection	Macropodidae	TBA	Lawn Hill Gorge	-18.15	138.717	Queensland	Australia	<1984		SAMN28906554	PRJNA846960	7.4
SP14_indexing56	M07604	Petrogale	wilkinsi			Australian National Wildlife Collection	Macropodidae	TBA	Kolondjarluk, Deaf Adder Creek, Arnhem Land	-13.1	132.95	Northern Territory	Australia	1972	X			3.3

## Sheet: Table S3
Supplementary Table S3: Coefficients and significance for GLM models with response variables a) proportion of reads on target, b) heterozygosity, c) average coverage and d) proportion of loci captured
A) Proportion of reads on target
MODEL: glm(formula = ontarg ~ factor(tissue) * collyear * factor(index)
	Estimate	Std. Error	t value	Pr(>|t|)	Significance
(Intercept)	-1.481	0.9442	-1.568	0.1206
factor(tissue)	2.042	1.496	1.366	0.1757
collyear	0.001056	0.0004912	2.15	0.0344	*
factor(index)	-25.58	65.35	-0.391	0.6965
factor(tissue):collyear	-0.0009653	0.0007759	-1.244	0.2169
factor(tissue):factor(index)single	27.05	65.39	0.414	0.6802
collyear:factor(index)	0.01359	0.03516	0.387	0.7001
factor(tissue):collyear:factor(index)	-0.01456	0.03518	-0.414	0.6801
B) Heterozygosity
MODEL: glm(formula = hetero ~ factor(tissue) * collyear * factor(index)
	Estimate	Std. Error	t value	Pr(>|t|)
(Intercept)	1.474	0.7484	1.97	0.05219	.
factor(tissue)	-0.1821	1.185	-0.154	0.87827
collyear	-0.0007005	0.0003894	-1.799	0.07562	.
factor(index)	-139.1	51.8	-2.686	0.00872	**
factor(tissue):collyear	0.0001118	0.000615	0.182	0.85615
factor(tissue):factor(index)single	136.3	51.83	2.629	0.01018	*
collyear:factor(index)	0.07489	0.02787	2.687	0.00868	**
factor(tissue):collyear:factor(index)	-0.07329	0.02789	-2.628	0.0102	*
C) Average coverage
glm(formula = cov ~ factor(tissue) * collyear * factor(index))
	Estimate	Std. Error	t value	Pr(>|t|)
(Intercept)	-571.251	562.421	-1.016	0.313
factor(tissue)	802.452	890.869	0.901	0.37
collyear	0.3149	0.2926	1.076	0.285
factor(index)	-3370.76	38928.8	-0.087	0.931
factor(tissue):collyear	-0.3582	0.4622	-0.775	0.441
factor(tissue):factor(index)single	332.538	38951.4	0.009	0.993
collyear:factor(index)	1.8171	20.9443	0.087	0.931
factor(tissue):collyear:factor(index)	-0.2177	20.9559	-0.01	0.992
D) Proportion of loci captured
glm(formula = loci ~ factor(tissue) * collyear * factor(index))
	Estimate	Std. Error	t value	Pr(>|t|)
(Intercept)	1.138	1.933	0.589	0.558
factor(tissue)	-0.377	3.063	-0.123	0.902
collyear	-0.0002617	0.001006	-0.26	0.795
factor(index)	-137.1	133.8	-1.024	0.309
factor(tissue):collyear	0.0003709	0.001589	0.233	0.816
factor(tissue):factor(index)single	137.7	133.9	1.029	0.307
collyear:factor(index)	0.0738	0.072	1.025	0.308
factor(tissue):collyear:factor(index)	-0.07415	0.07204	-1.029	0.306

## Sheet: Table S4
Supplementary Table S4: Population genomic summary statistics across rock-wallaby populations for both historical de novo and high-quality de novo mapping approaches, only using over-lapping loci
population	mapping approach	# loci	# valid sites (vs)	# unknown sites	# segregating sites (ss)	proportion of ss to vs	mean Tajima's D ± SD	mean theta ± SD
CC	historical de novo	315	218876	871	519	0.0024	-0.406 ± 0.699	1.17 ± 2.44
	high-quality de novo	315	219032	2467	453	0.0021	-0.404 ± 0.698	0.79 ± 0.59
CM	historical de novo	1118	479807	140322	2384	0.005	-0.916 ± 0.627	0.93 ± 2.75
	high-quality de novo	1118	547556	72576	1993	0.0036	-0.917 ± 0.613	0.72 ± 1.03
BV	historical de novo	194	125741	1933	482	0.0038	-0.263 ± 0.940	1.62 ± 4.98
	high-quality de novo	194	126453	720	466	0.0037	-0.283 ± 0.936	1.24 ± 4.10
BB	historical de novo	277	129611	39784	449	0.0035	-1.019 ± 0.397	1.53 ± 6.00
	high-quality de novo	277	148833	4197	406	0.0027	-1.020 ± 0.366	0.67 ± 0.48
W	historical de novo	358	286787	15868	640	0.0022	-0.909 ± 0.680	0.84 ± 3.16
	high-quality de novo	358	291094	11561	572	0.002	-0.926 ± 0.642	0.73 ± 3.15
W_Groote	historical de novo	68	44748	306	88	0.002	NA	2.36 ± 11.34
	high-quality de novo	68	44606	448	84	0.0019	NA	0.84 ± 0.48
W_Gulf	historical de novo	608	233801	109503	1251	0.0054	-0.354 ± 0.895	1.07 ± 0.89
	high-quality de novo	608	263999	79306	1243	0.0047	-0.365 ± 0.894	1.19 ± 1.37
